# Supplementary material
Source: MDPI journal article supplement (https://www.mdpi.com/2077-0472/12/10/1552)
Supplement: s1 [file s1]

**Table S1.** Changes of soil organic carbon contents (g kg<sup>-1</sup>) under different tillage and straw return practices from (2012-2014).

| Crop season       | Soil layers | CTNS          | CTSR          | NTNS           | NTSR          | T  | SR | T×SR |
|-------------------|-------------|---------------|---------------|----------------|---------------|----|----|------|
| 2012 rice season  | 0-5 cm      | 16.71±0.31 a  | 17.40±0.70 a  | 16.63±0.50 a   | 18.15±0.52 a  | ns | *  | ns   |
|                   | 5-10 cm     | 16.18±0.11 a  | 16.87±0.45 a  | 16.29±0.30 a   | 17.03±0.45 a  | ns | ns | ns   |
|                   | 10-20 cm    | 15.16±0.61 a  | 16.27±0.97 a  | 14.61±0.17 a   | 14.47±0.71 a  | ns | ns | ns   |
| 2013 wheat season | 0-5 cm      | 17.58±0.57 b  | 18.76±0.38 b  | 18.32±0.19 b   | 20.10±0.18 a  | *  | *  | ns   |
|                   | 5-10 cm     | 16.99±0.55 a  | 16.27±0.41 a  | 15.85±0.44 a   | 17.62±0.67 a  | ns | ns | ns   |
|                   | 10-20 cm    | 15.52±0.32 a  | 16.17±0.57 a  | 14.99±0.22 a   | 15.92±0.26 a  | ns | ns | ns   |
| 2013 rice season  | 0-5 cm      | 17.17±0.55 c  | 18.78±0.37 b  | 19.85±0.22 b   | 21.61±0.44 a  | *  | *  | ns   |
|                   | 5-10 cm     | 15.99±0.45 a  | 17.35±0.32 a  | 15.51±1.78 a   | 15.52±1.01 a  | ns | ns | ns   |
|                   | 10-20 cm    | 15.72±0.45 a  | 16.50±0.35 a  | 14.55±0.72 a   | 15.38±0.81 a  | *  | ns | ns   |
| 2014 wheat season | 0-5 cm      | 18.64±0.14 c  | 19.99±0.13 a  | 19.19±0.27 b   | 20.32±0.03 a  | ns | *  | ns   |
|                   | 5-10 cm     | 17.19±0.55 a  | 17.45±0.29 a  | 16.74±0.94 a   | 17.95±0.82 a  | ns | ns | ns   |
|                   | 10-20 cm    | 15.92±0.65 a  | 16.34±0.59 a  | 16.14±0.47 a   | 15.98±0.47 a  | ns | ns | ns   |
| 2014 rice season  | 0-5 cm      | 18.35±0.26 c  | 19.86± 0.33 b | 19.16± 0.26 bc | 20.75±0.19 a  | *  | *  | ns   |
|                   | 5-10 cm     | 17.16± 0.47 a | 17.47± 0.33 a | 16.80± 0.76 a  | 17.79± 0.68 a | ns | ns | ns   |
|                   | 10-20 cm    | 15.63± 0.26 a | 15.86± 0.33 a | 16.07± 0.32 a  | 15.41± 0.44 a | ns | ns | ns   |

Different letters in the columns denote statistical differences in the means of the variables between treatments by the least significant difference test ( $P < 0.05$ ). \*,  $P < 0.05$ ; ns, not significant. CTNS, conventional intensive tillage with straw removal; CTSR, conventional intensive tillage with straw return; NTNS, no tillage with straw removal; NTSR, no-tillage with straw return. T, tillage; SR, straw return practices. T×SR, the interactions between tillage and straw return. Values are mean ± standard deviation (n = 3).

**Table S2.** Changes in aggregate composition (%) under different tillage and straw return practices in 0-5 cm soil layer (2012–2014).

| Crop season       | Soil aggregate | CTNS         | CTSR          | NTNS         | NTSR         | T  | SR | T×SR |
|-------------------|----------------|--------------|---------------|--------------|--------------|----|----|------|
|                   | fraction       |              |               |              |              |    |    |      |
| 2012 rice season  | 1-2 mm         | 27.77±0.94 a | 28.55±1.52 a  | 25.66±1.68 a | 25.19±1.20 a | ns | ns | ns   |
|                   | 0.25-1 mm      | 52.10±0.83 a | 49.40±1.25 a  | 56.02±1.42 a | 51.39±2.43 a | ns | ns | ns   |
|                   | 0.053-0.25 mm  | 16.60±1.41 a | 18.72±1.92 a  | 15.38±0.35 a | 19.67±3.12 a | ns | ns | ns   |
|                   | <0.053 mm      | 3.53±0.15 a  | 3.33±0.07 a   | 2.94±0.10 a  | 3.76±0.43 a  | ns | ns | ns   |
| 2013 wheat season | 1-2 mm         | 30.98±0.21 b | 32.49±0.84 ab | 31.53±0.37 b | 33.41±0.37 a | ns | *  | ns   |
|                   | 0.25-1 mm      | 48.39±0.27 a | 49.01±0.69 a  | 48.60±0.71 a | 47.85±0.47 a | ns | ns | ns   |
|                   | 0.053-0.25 mm  | 16.48±0.26 a | 14.57±1.33 a  | 15.61±1.03 a | 14.25±0.28 a | ns | ns | ns   |
|                   | <0.053 mm      | 4.15±0.24 a  | 3.93±0.17 a   | 4.26±0.32 a  | 4.49±0.33 a  | ns | ns | ns   |
| 2013 rice season  | 1-2 mm         | 28.60±0.06 b | 29.25±0.06 b  | 28.77±0.15 b | 30.63±0.40 a | *  | *  | ns   |
|                   | 0.25-1 mm      | 48.49±0.69 a | 48.43±0.66 a  | 48.71±0.33 a | 49.14±0.16 a | ns | ns | ns   |
|                   | 0.053-0.25 mm  | 18.62±0.26 a | 17.91±0.72 a  | 18.56±0.51 a | 17.14±0.56 a | ns | ns | ns   |
|                   | <0.053 mm      | 4.29±0.38 a  | 4.41±0.37 a   | 3.96±0.32 ab | 3.09±0.09 b  | *  | ns | ns   |
| 2014 wheat season | 1-2 mm         | 28.52±0.46 c | 30.75±0.11 ab | 30.31±0.30 b | 31.40±0.28 a | *  | *  | ns   |
|                   | 0.25-1 mm      | 49.22±0.52 a | 47.90±0.46 a  | 48.54±0.65 a | 48.53±0.20 a | ns | ns | ns   |
|                   | 0.053-0.25 mm  | 16.78±0.66 a | 17.22±0.19 a  | 16.77±0.60 a | 16.43±0.56 a | ns | ns | ns   |
|                   | <0.053 mm      | 5.48±0.33 a  | 4.13±0.40 b   | 4.37±0.31 b  | 3.64±0.11 b  | ns | *  | ns   |

Different letters in the columns denote statistical differences in the means of the variables between treatments by the least significant difference test ( $P < 0.05$ ). \*,  $P < 0.05$ ; ns, not significant. CTNS, conventional intensive tillage with straw removal; CTSR, conventional intensive tillage with straw return; NTNS, no tillage with straw removal; NTSR, no-tillage with straw return. T, tillage; SR, straw return practices. T×SR, the interactions between tillage and straw return. Values are mean  $\pm$  standard deviation ( $n = 3$ ).

**Table S3.** Changes of dissolved organic carbon (g kg<sup>-1</sup>) contents in 0-5 cm soil layer under different tillage and straw return practices during 2012-2014.

| Treatment | 2012        | 2013         |             | 2014         |             |
|-----------|-------------|--------------|-------------|--------------|-------------|
|           | Rice season | Wheat season | Rice season | Wheat season | Rice season |
| CTNS      | 1.05±0.03 a | 0.77±0.02 c  | 0.99±0.03 c | 0.87±0.03 c  | 1.03±0.01 c |
| CTSR      | 1.11±0.05 a | 0.89±0.03 b  | 1.17±0.03 c | 1.04±0.04 b  | 1.18±0.01 b |
| NTNS      | 1.13±0.01 a | 0.79±0.01 c  | 1.03±0.02 b | 0.99±0.02 b  | 1.13±0.01 b |
| NTSR      | 1.13±0.05 a | 1.04±0.03 a  | 1.33±0.01 a | 1.16±0.03 a  | 1.26±0.02 a |
| T         | ns          | ns           | ns          | *            | *           |
| SR        | ns          | *            | *           | *            | *           |
| T×SR      | ns          | *            | *           | ns           | ns          |

Different letters in the columns denote statistical differences in the means of the variables between treatments by the least significant difference test ( $P < 0.05$ ). \*,  $P < 0.05$ ; ns, not significant. CTNS, conventional intensive tillage with straw removal; CTSR, conventional intensive tillage with straw return; NTNS, no tillage with straw removal; NTSR, no-tillage with straw return. T, tillage; SR, straw return practices. T×SR, the interactions between tillage and straw return. Values are mean  $\pm$  standard deviation ( $n = 3$ ).

**Table S4.** Changes of soil microbial biomass carbon (mg kg<sup>-1</sup>) contents in 0-5 cm soil layer under different tillage and straw return practices during 2012-2014.

| Treatment | 2012         | 2013          |               | 2014         |              |
|-----------|--------------|---------------|---------------|--------------|--------------|
|           | Rice season  | Wheat season  | Rice season   | Wheat season | Rice season  |
| CTNS      | 903±36.59 a  | 770±88.83 c   | 1191±5.18 c   | 1593±7.37 c  | 1131±56.66 c |
| CTSR      | 879±92.80 a  | 1018±53.57 ab | 1316±38.35 b  | 1759±20.96 b | 1290±43.78 c |
| NTNS      | 773±77.77 a  | 918±47.42 bc  | 1273±16.04 bc | 1684±9.70 b  | 1507±49.49 b |
| NTSR      | 982±101.47 a | 1140±42.71 a  | 1593±48.67 a  | 2389±22.11 a | 1877±77.80 a |
| T         | ns           | *             | *             | *            | *            |
| SR        | ns           | *             | *             | *            | *            |
| T×SR      | ns           | ns            | *             | *            | *            |

Different letters in the columns denote statistical differences in the means of the variables between treatments by the least significant difference test ( $P < 0.05$ ). \*,  $P < 0.05$ ; ns, not significant. CTNS, conventional intensive tillage with straw removal; CTSR, conventional intensive tillage with straw return; NTNS, no tillage with straw removal; NTSR, no-tillage with straw return. T, tillage; SR, straw return practices. T×SR, the interactions between tillage and straw return. Values are mean ± standard deviation (n = 3).

**Table S5.** Soil bacterial and fungal PLFA under different tillage practices and residue returning methods in 0-5 cm soil layer (2013–2014).

| Treatment | 2013 wheat season |              | 2013 rice season |             | 2014 wheat season |             | 2014 rice season |             |
|-----------|-------------------|--------------|------------------|-------------|-------------------|-------------|------------------|-------------|
|           | Bacterial PLFA    | Fungal PLFA  | Bacterial PLFA   | Fungal PLFA | Bacterial PLFA    | Fungal PLFA | Bacterial PLFA   | Fungal PLFA |
| CTNS      | 6.56±2.03 b       | 0.08±0.03 ab | 9.64±0.25 c      | /           | 11.95±0.80 c      | 0.16±0.04 a | 14.48±0.06 b     | /           |
| CTSR      | 10.85±1.02 b      | 0.12±0.05 ab | 14.69±1.19 b     | /           | 18.68±1.16 b      | 0.15±0.01 a | 17.66±0.78 b     | /           |
| NTNS      | 10.04±1.22 b      | 0.06±0.03 b  | 12.84±0.22 b     | /           | 16.52±0.34 b      | 0.14±0.03 a | 15.94±1.01 b     | /           |
| NTSR      | 18.45±1.41a       | 0.15±0.03 a  | 20.15±0.28 a     | /           | 31.33±1.65 a      | 0.24±0.05 a | 30.91±3.72 a     | /           |
| T         | ns                | ns           | *                | /           | *                 | ns          | ns               | /           |
| SR        | *                 | ns           | *                | /           | *                 | ns          | *                | /           |
| T*SR      | ns                | ns           | ns               | /           | *                 | ns          | ns               | /           |

Different letters in the columns denote statistical differences in the means of the variables between treatments by the least significant difference test ( $P < 0.05$ ). \*,  $P < 0.05$ ; ns, not significant. CTNS, conventional intensive tillage with straw removal; CTSR, conventional intensive tillage with straw return; NTNS, no tillage with straw removal; NTSR, no-tillage with straw return. T, tillage; SR, straw return practices. T×SR, the interactions between tillage and straw return. Values are mean  $\pm$  standard deviation ( $n = 3$ ).

**Table S6.** The change in bacterial community at order level (relative abundance >0.5%) under different tillage and straw return practice in 2013 rice season.

| Bacterial community |                            |                           | CTNS         | CTSR         | NTNS          | NTSR         | T  | SR | T×SR |
|---------------------|----------------------------|---------------------------|--------------|--------------|---------------|--------------|----|----|------|
| Phylum              | Class                      | Order                     |              |              |               |              |    |    |      |
| Acidobacteria       | <i>Acidobacteria_Gp1</i>   | <i>Gp1</i>                | 19.60±0.97 a | 22.21±1.17 a | 19.30±2.68 ab | 15.11±0.97 b | *  | ns | *    |
|                     | <i>Acidobacteria_Gp18</i>  | <i>Gp18</i>               | 5.81±0.21 a  | 4.52±0.27 b  | 4.34±0.30 b   | 3.98±0.13 b  | *  | *  | *    |
|                     | <i>Acidobacteria_Gp3</i>   | <i>Gp3</i>                | 3.55±0.46 a  | 3.38±0.26 a  | 3.90±0.62 a   | 3.37±0.22 a  | ns | ns | ns   |
|                     | <i>Acidobacteria_Gp6</i>   | <i>Gp6</i>                | 1.96±0.55 a  | 1.98±0.10 a  | 2.20±0.86 a   | 2.76±0.12 a  | ns | ns | ns   |
|                     | <i>Acidobacteria_Gp7</i>   | <i>Gp7</i>                | 1.93±0.08 a  | 1.80±0.27 a  | 1.77±0.21 a   | 1.68±0.09 a  | ns | ns | ns   |
|                     | <i>Acidobacteria_Gp2</i>   | <i>Gp2</i>                | 1.16±0.79 a  | 1.48±0.16 a  | 1.78±0.62 a   | 0.95±0.12 a  | ns | ns | ns   |
|                     | <i>Acidobacteria_Gp13</i>  | <i>Gp13</i>               | 0.81±0.03 a  | 0.91±0.12 a  | 0.72±0.30 a   | 0.92±0.07 a  | ns | ns | ns   |
|                     | <i>Acidobacteria_Gp4</i>   | <i>Gp4</i>                | 0.65±0.02 b  | 0.34±0.02 c  | 0.40±0.05 c   | 1.23±0.05 a  | *  | *  | *    |
|                     | <i>Acidobacteria_Gp17</i>  | <i>Gp17</i>               | 0.57±0.12 b  | 0.46±0.06 b  | 0.50±0.04 b   | 0.79±0.09 a  | ns | *  | *    |
|                     | <i>Acidobacteria_Gp16</i>  | <i>Gp16</i>               | 0.56±0.13 a  | 0.43±0.10 a  | 0.66±0.16 a   | 0.54±0.16 a  | *  | ns | ns   |
| Actinobacteri<br>a  | <i>Holophagae</i>          | <i>Holophagales</i>       | 0.61±0.06 ab | 0.42±0.04 b  | 0.60±0.18 ab  | 0.79±0.06 a  | ns | ns | *    |
|                     | <i>Actinobacteria</i>      | <i>Actinomycetales</i>    | 1.03±0.17 a  | 1.41±0.12 a  | 1.80±0.97 a   | 1.68±0.16 a  | ns | ns | ns   |
| Bacteroidetes       | <i>Sphingobacteria</i>     | <i>Sphingobacteriales</i> | 1.87±0.82 a  | 1.94±0.26 a  | 1.82±0.81 a   | 2.56±0.12 a  | ns | ns | ns   |
| Chloroflexi         | <i>Anaerolineae</i>        | <i>Anaerolineales</i>     | 5.38±1.75 a  | 3.48±0.28 a  | 6.54±1.73 a   | 3.60±1.08 a  | ns | ns | ns   |
|                     | <i>Dehalococcoidetes</i>   | <i>Dehalogenimonas</i>    | 0.78±0.08 b  | 0.48±0.07 c  | 0.64±0.09 bc  | 0.98±0.03 a  | *  | ns | *    |
| Chamydiae           | <i>Chamydiae</i>           | <i>Chlamydiales</i>       | 1.56±0.09 b  | 1.71±0.13 b  | 1.62±0.20 b   | 2.29±0.17 a  | ns | *  | *    |
| Proteobacteria      | <i>Alphaproteobacteria</i> | <i>Rhodospirillales</i>   | 3.92±0.35 a  | 3.95±0.34 a  | 4.19±0.08 a   | 3.92±0.14 a  | ns | ns | ns   |
|                     |                            | <i>Caulobacteriales</i>   | 0.61±0.05 b  | 0.60±0.10 b  | 0.64±0.03 b   | 0.90±0.06 a  | *  | *  | *    |

|                 |                            |                                               |              |              |              |              |    |    |    |
|-----------------|----------------------------|-----------------------------------------------|--------------|--------------|--------------|--------------|----|----|----|
|                 |                            | <i>Rhizobiales</i>                            | 1.21±0.17 b  | 1.35±0.24 ab | 2.26±0.58 a  | 1.12±0.30 b  | ns | ns | ns |
|                 | <i>Betaproteobacteria</i>  |                                               |              |              |              |              |    |    |    |
|                 |                            | <i>Burkholderiales</i>                        | 2.35±0.68 a  | 1.20±0.10 b  | 2.03±0.15 ab | 1.53±0.40 ab | ns | *  | ns |
|                 |                            | <i>Syntrophobacteriales</i>                   | 1.43±0.30 b  | 1.34±0.19 b  | 1.38±0.38 b  | 2.32±0.06 a  | ns | ns | *  |
|                 | <i>Deltaproteobacteria</i> | <i>Desulfuromonadales</i>                     | 1.65±0.55 a  | 1.05±0.23 a  | 2.09±0.62 a  | 1.49±0.32 a  | *  | ns | ns |
|                 |                            | <i>Myxococcales</i>                           | 1.33±0.38 a  | 1.04±0.08 a  | 1.99±0.62 a  | 1.41±0.48 a  | *  | ns | ns |
|                 | <i>Gammaproteobacteria</i> | <i>Xanthomonadales</i>                        | 1.40±0.19 b  | 1.55±0.06 ab | 1.33±0.18 b  | 1.83±0.18 a  | ns | ns | ns |
|                 |                            | <i>Legionellales</i>                          | 1.34±0.09 a  | 1.27±0.14 ab | 1.34±0.09 a  | 1.01±0.13 b  | *  | ns | ns |
| Planctomycetes  | <i>Planctomycetacia</i>    | <i>Planctomycetales</i>                       | 0.97±0.34 a  | 1.44±0.34 a  | 1.45±0.28 a  | 1.29±0.17 a  | ns | ns | ns |
|                 |                            | <i>Subdivision3_genera_incertae_sedibus</i>   | 23.95±2.95 a | 24.16±0.68 a | 17.57±6.02 a | 25.50±1.96 a |    |    |    |
|                 | <i>Subdivision3</i>        | <i>s</i>                                      |              |              |              |              | ns | ns | ns |
| Verrucomicrobia | <i>Opitutae</i>            | <i>Opitiales</i>                              | 4.67±0.56 a  | 4.70±0.44 a  | 5.58±1.33 a  | 5.09±0.17 a  | ns | ns | ns |
|                 |                            | <i>Spartobacteria_genera_incertae_sedibus</i> | 2.68±0.31 b  | 4.45±0.68 a  | 3.91±0.97 ab | 3.09±0.32 ab |    |    |    |
|                 | <i>Spartobacteria</i>      | <i>edis</i>                                   |              |              |              |              | ns | ns | *  |

Different letters in the columns denote statistical differences in the means of the variables between treatments by the least significant difference test ( $P < 0.05$ ). \*,  $P < 0.05$ ; ns, not significant. CTNS, conventional intensive tillage with straw removal; CTSR, conventional intensive tillage with straw return; NTNS, no tillage with straw removal; NTSR, no-tillage with straw return. T, tillage; SR, straw return practices. T×SR, the interactions between tillage and straw return. Values are mean  $\pm$  standard deviation (n = 3).

Table S7 The change in bacterial community at order level (relative abundance >0.5%) under different tillage and straw return practice in 2014 wheat season

| Bacterial community     |                            |                           | CTNS         | CTS          | NTNS         | NTS          | T  | SR | T×S<br>R |
|-------------------------|----------------------------|---------------------------|--------------|--------------|--------------|--------------|----|----|----------|
| Phylum                  | Class                      | Order                     |              |              |              |              |    |    |          |
|                         | <i>Acidobacteria_Gp1</i>   | <i>Gp1</i>                | 5.78±1.50 a  | 4.62±0.81 a  | 3.70±0.69 a  | 5.33±1.32 a  | ns | ns | ns       |
|                         | <i>Acidobacteria_Gp3</i>   | <i>Gp3</i>                | 5.01±4.00 a  | 4.55±2.17 a  | 2.86±1.32 a  | 6.13±1.58 a  | ns | ns | ns       |
|                         | <i>Acidobacteria_Gp16</i>  | <i>Gp16</i>               | 2.75±0.16 a  | 2.82±0.46 a  | 4.55±1.87 a  | 2.17±0.51 a  | ns | ns | ns       |
|                         | <i>Acidobacteria_Gp6</i>   | <i>Gp6</i>                | 0.26±0.30 a  | 1.88±3.03 a  | 1.88±2.96 a  | 4.87±1.29 a  | ns | ns | ns       |
| <i>Acidobacteria</i>    | <i>Acidobacteria_Gp4</i>   | <i>Gp4</i>                | 0.22±0.20 b  | 0.90±0.86 ab | 0.27±0.14 b  | 2.35±0.80 a  | ns | *  | ns       |
|                         | <i>Acidobacteria_Gp10</i>  | <i>Gp10</i>               | 0.18±0.25 b  | 0.48±0.68 b  | 0.32±0.51 b  | 2.55±1.19 a  | ns | *  | ns       |
|                         | <i>Acidobacteria_Gp18</i>  | <i>Gp18</i>               | 0.47±0.37 b  | 0.62±0.36 ab | 0.50±0.14 b  | 1.29±0.14 a  | ns | *  | *        |
|                         | <i>Acidobacteria_Gp17</i>  | <i>Gp17</i>               | 0.15±0.15 a  | 0.48±0.53 a  | 0.70±0.83 a  | 1.33±0.87 a  | ns | ns | ns       |
|                         | <i>Acidobacteria_Gp7</i>   | <i>Gp7</i>                | 0.18±0.09 b  | 0.55±0.43 b  | 0.29±0.17 b  | 1.34±0.09 a  | ns | *  | ns       |
| <i>Actinobacteria</i>   | <i>Actinobacteria</i>      | <i>Actinomycetales</i>    | 2.42±0.92 a  | 1.49±0.50 a  | 2.42±1.76 a  | 2.45±1.84 a  | ns | ns | ns       |
|                         | <i>Sphingobacteria</i>     | <i>Sphingobacteriales</i> | 1.34±0.69 a  | 2.68±1.96 a  | 1.08±0.83 a  | 3.72±0.57 a  | ns | *  | ns       |
| <i>Bacteroidetes</i>    | <i>Flavobacteria</i>       | <i>Flavobacteriales</i>   | 0.64±0.34 a  | 0.92±0.52 a  | 0.68±0.73 a  | 1.57±0.68 a  | ns | *  | *        |
| <i>Chloroflexi</i>      | <i>Anaerolineae</i>        | <i>Anaerolineales</i>     | 26.13±4.13 a | 27.94±3.47 a | 27.78±1.90 a | 20.71±4.48 a | ns | ns | ns       |
| <i>Gemmatimonadetes</i> | <i>Gemmatimonadetes</i>    | <i>Gemmatimonadales</i>   | 13.45±6.95 a | 8.85±6.74 a  | 10.08±1.46 a | 3.44±0.68 a  | ns | *  | ns       |
| <i>Nitrospira</i>       | <i>Nitrospira</i>          | <i>Nitrospirales</i>      | 3.25±0.89 a  | 2.63±1.32 a  | 3.42±1.59 a  | 1.22±0.40 a  | ns | ns | ns       |
| <i>Planctomycetes</i>   | <i>Planctomycetacia</i>    | <i>Planctomycetales</i>   | 9.84±3.06 a  | 8.16±3.45 a  | 7.28±3.79 a  | 4.69±1.26 a  | ns | ns | ns       |
|                         |                            | <i>Rhizobiales</i>        | 11.96±1.88 a | 11.44±5.33 a | 12.51±2.73 a | 5.50±0.63 a  | ns | ns | ns       |
| <i>Proteobacteria</i>   | <i>Alphaproteobacteria</i> | <i>Rhodospirillales</i>   | 5.58±2.10 a  | 3.60±2.11 a  | 3.49±0.74 a  | 1.66±0.14 a  | ns | *  | ns       |
|                         |                            | <i>Caulobacteriales</i>   | 0.57±0.06 a  | 0.97±0.32 a  | 1.05±0.18 a  | 0.91±0.63 a  | ns | ns | ns       |



|                            |                          |             |              |              |               |    |    |    |
|----------------------------|--------------------------|-------------|--------------|--------------|---------------|----|----|----|
|                            | <i>Burkholderiales</i>   | 1.84±1.12 a | 3.99±3.53 a  | 3.76±2.92 a  | 6.73±1.14 a   | ns | ns | ns |
| <i>Betaproteobacteria</i>  | <i>Rhodocyclales</i>     | 1.16±0.12 a | 1.19±0.45 a  | 0.92±0.20 a  | 1.56±0.48 a   | ns | ns | ns |
|                            | <i>Hydrogenophilales</i> | 0.51±0.15 a | 0.78±0.22 a  | 0.66±0.17 a  | 0.62±0.15 a   | ns | ns | ns |
| <i>Gammaproteobacteria</i> | <i>Xanthomonadales</i>   | 1.70±0.54 b | 2.35±0.33 ab | 2.65±0.41 ab | 3.30±0.89 a   | ns | ns | ns |
| <i>Deltaproteobacteria</i> | <i>Myxococcales</i>      | 0.44±0.39 b | 1.09±1.14 ab | 1.23±1.57 ab | 3.47±0.36 a * | ns | ns | ns |

---

Different letters in the columns denote statistical differences in the means of the variables between treatments by the least significant difference test ( $P < 0.05$ ). \*,  $P < 0.05$ ; ns, not significant. CTNS, conventional intensive tillage with straw removal; CTSR, conventional intensive tillage with straw return; NTNS, no tillage with straw removal; NTSR, no-tillage with straw return. T, tillage; SR, straw return practices. T×SR, the interactions between tillage and straw return. Values are mean  $\pm$  standard deviation (n = 3).

**Table S8.** Crop yield (kg ha<sup>-1</sup> y<sup>-1</sup>) under different tillage practices and residue returning methods (2012–2014).

| Treatment | 2012        | 2013         |             | 2014         |             |
|-----------|-------------|--------------|-------------|--------------|-------------|
|           | Rice season | Wheat season | Rice season | Wheat season | Rice season |
| CTNS      | 7325±200 a  | 4652±336 a   | 7615±287 a  | 5114±213 ab  | 7767±220 a  |
| CTSR      | 7022±534 a  | 4585±150 a   | 7901±279 a  | 5564±291 b   | 7848±171 a  |
| NTNS      | 7230±120 a  | 4868±137 a   | 7413±260 a  | 5142±105 ab  | 7840±59 a   |
| NTSR      | 7636±315 a  | 4776±207 a   | 7894±263 a  | 4668±218 a   | 7878±175 a  |
| T         | ns          | ns           | ns          | *            | ns          |
| SR        | ns          | ns           | ns          | ns           | ns          |
| T×SR      | ns          | ns           | ns          | **           | ns          |

Different letters in the columns denote statistical differences in the means of the variables between treatments by the least significant difference test ( $P < 0.05$ ). \*,  $P < 0.05$ ; ns, not significant. CTNS, conventional intensive tillage with straw removal; CTSR, conventional intensive tillage with straw return; NTNS, no tillage with straw removal; NTSR, no-tillage with straw return. T, tillage; SR, straw return practices. T×SR, the interactions between tillage and straw return. Values are mean  $\pm$  standard deviation (n = 3).

**Table S9** The relationship between crop yield and soil properties

|                            | Crop yield | SOC in 0-5 cm soil layer | SOC in 5-10 cm soil layer | SOC in 10-20 cm soil layer | DOC    | MBC    |
|----------------------------|------------|--------------------------|---------------------------|----------------------------|--------|--------|
| Crop yield                 | 1          | -0.18                    | -0.27                     | -0.22                      | 0.62** | -0.22  |
| SOC in 0-5 cm soil layer   | -0.18      | 1                        | 0.09                      | 0.18                       | 0.32*  | 0.62** |
| SOC in 5-10 cm soil layer  | -0.27      | 0.09                     | 1                         | 0.23                       | -0.01  | 0.22   |
| SOC in 10-20 cm soil layer | -0.22      | 0.18                     | 0.23                      | 1                          | -0.02  | 0.24   |
| DOC                        | 0.62**     | 0.32*                    | -0.01                     | -0.02                      | 1      | 0.29*  |
| MBC                        | -0.22      | 0.62**                   | 0.22                      | 0.24                       | 0.29*  | 1      |

Note: SOC, soil organic C; MBC, microbial biomass C; DOC, dissolved organic carbon. \*,  $P < 0.05$ ; \*\*,  $P < 0.01$ .
